# Supplementary material for: Factors that influence mental health and well-being of high-performance athletes from Olympic or Paralympic sport who have transitioned out of national-level or international-level sport: a mixed methods approach
Source: PubMed Central journal article supplement — BMJ Open Sport Exerc Med. 2024 May 30;10(2):e001991. doi: 10.1136/bmjsem-2024-001991 (PMC11141181; doi:10.1136/bmjsem-2024-001991), 2024-05-30
Supplement: bmjsem-2024-001991supp003.pdf [file bmjsem-2024-001991supp003.pdf]

## APPENDIX C

## Measurement Model

| Variable                                  | Item                                                                  | Indicator Loading | $\rho_{hc}$ | AVE  |
|-------------------------------------------|-----------------------------------------------------------------------|-------------------|-------------|------|
| Retirement Support Friends and Family     | Spouse/ partner                                                       | 0.415             | .780        | .566 |
|                                           | Other family members                                                  | 0.961             |             |      |
|                                           | Other friends                                                         | 0.775             |             |      |
| Retirement Support Sport                  | Team mates                                                            | 1.000             | .787        | .664 |
|                                           | Coach                                                                 | 0.573             |             |      |
| Retirement Support Sports Organisations   | National sporting organisation                                        | 0.973             | .833        | .564 |
|                                           | State association                                                     | 0.700             |             |      |
| Identity Retirement Difficulties Identity | Missing social aspect of sport                                        | 0.522             | .873        | .641 |
|                                           | Loss of (elite athlete) status                                        | 0.790             |             |      |
|                                           | Feeling incompetent in activities other than sport                    | 0.917             |             |      |
|                                           | Lack of self-confidence                                               | 0.909             | .745        | .512 |
| Life Stresses Retirement Difficulties     | Job/ study pressures                                                  | 0.501             |             |      |
|                                           | Relationships with coach/ sport managers                              | -                 |             |      |
|                                           | Ongoing injury management                                             | -                 |             |      |
|                                           | Relationships with family/friends                                     | 0.979             |             |      |
|                                           | Personal illness (physical/mental)                                    | 0.573             |             |      |
|                                           | Illness in family                                                     | -                 |             |      |
| Positive Retirement Experiences           | I enjoy having a more flexible lifestyle than before I retired.       | -                 | .760        | .533 |
|                                           | I am enjoying and appreciating retirement.                            | 0.704             |             |      |
|                                           | I have social groups I enjoy spending time with.                      | 0.944             |             |      |
|                                           | I have enough time for activities I enjoy and find interesting.       | 0.461             |             |      |
|                                           | I have enough money to be happy.                                      | -                 |             |      |
| Negative Retirement Experiences           | I don't have many meaningful tasks or roles now that I am retired     | 0.720             | .841        | .639 |
|                                           | I am finding it hard to adjust to being retired.                      | 0.817             |             |      |
|                                           | I miss the socialising and day-to-day structure of working life.      | -                 |             |      |
|                                           | I feel anxious more often than I did before I retired.                | 0.855             |             |      |
|                                           | I frequently feel stressed by financial limitations.                  | -                 |             |      |
| Psychological Wellbeing                   | I lead a purposeful and meaningful life                               | 0.871             | .928        | .672 |
|                                           | My social relationships are supportive and rewarding                  | 0.749             |             |      |
|                                           | I am engaged and interested in my daily activities                    | 0.888             |             |      |
|                                           | I actively contribute to the happiness and well-being of others       | 0.863             |             |      |
|                                           | I am competent and capable in the activities that are important to me | 0.733             |             |      |
|                                           | I am a good person and live a good life                               | 0.808             |             |      |
|                                           | I am optimistic about my future                                       | 0.906             |             |      |
|                                           | People respect me                                                     | 0.715             |             |      |
| Psychological Distress                    | Tired for no good reason?                                             | 0.631             | .946        | .640 |
|                                           | Nervous?                                                              | 0.726             |             |      |
|                                           | So nervous nothing could calm you down?                               | 0.772             |             |      |
|                                           | Hopeless?                                                             | 0.908             |             |      |
|                                           | Restless or fidgety?                                                  | 0.672             |             |      |
|                                           | So restless that you could not sit still?                             | 0.713             |             |      |
|                                           | Depressed?                                                            | 0.885             |             |      |
|                                           | Depressed that nothing could cheer you up?                            | 0.902             |             |      |
|                                           | That everything was an effort?                                        | 0.850             |             |      |
|                                           | Worthless?                                                            | 0.878             |             |      |

Items without a factor loading were removed from the final measurement model
