# Supplementary material for: Factors that influence mental health and well-being of high-performance athletes from Olympic or Paralympic sport who have transitioned out of national-level or international-level sport: a mixed methods approach
Source: PubMed Central journal article supplement — BMJ Open Sport Exerc Med. 2024 May 30;10(2):e001991. doi: 10.1136/bmjsem-2024-001991 (PMC11141181; doi:10.1136/bmjsem-2024-001991), 2024-05-30
Supplement: bmjsem-2024-001991supp004.pdf [file bmjsem-2024-001991supp004.pdf]

## APPENDIX D

## Structural Model

|                                        | Naïve LM benchmark Model | PLS-SEM Model |
|----------------------------------------|--------------------------|---------------|
| Retirement Difficulties Identity       |                          |               |
| RD1                                    | 1.906                    | <b>1.205</b>  |
| RD4                                    | 1.822                    | <b>1.395</b>  |
| RD5                                    | 1.735                    | <b>1.325</b>  |
| RD6                                    | 1.554                    | <b>1.346</b>  |
| Retirement Difficulties Life Pressures |                          |               |
| RD2                                    | 1.347                    | <b>1.164</b>  |
| RD8                                    | 1.427                    | <b>1.022</b>  |
| RD9                                    | 2.205                    | <b>1.448</b>  |
| Positive Retirement Experiences        |                          |               |
| PRE2                                   | 0.864                    | <b>0.636</b>  |
| PRE3                                   | 0.921                    | <b>0.658</b>  |
| PRE4                                   | 1.098                    | <b>0.649</b>  |
| Negative Retirement Experiences        |                          |               |
| NRE1                                   | 0.752                    | <b>0.698</b>  |
| NRE2                                   | 1.006                    | <b>0.635</b>  |
| NRE4                                   | 1.070                    | <b>0.844</b>  |
| Psychological Wellbeing                |                          |               |
| PWB1                                   | 1.092                    | <b>0.872</b>  |
| PWB2                                   | 1.377                    | <b>1.139</b>  |
| PWB3                                   | 0.981                    | <b>0.900</b>  |
| PWB4                                   | 1.132                    | <b>0.860</b>  |
| PWB5                                   | 0.834                    | <b>0.607</b>  |
| PWB6                                   | 0.874                    | <b>0.819</b>  |
| PWB7                                   | 1.020                    | <b>0.916</b>  |
| PWB8                                   | 0.893                    | <b>0.671</b>  |
| Psychological Distress                 |                          |               |
| K1                                     | 0.974                    | <b>0.724</b>  |
| K2                                     | 0.675                    | <b>0.650</b>  |
| K3                                     | 0.645                    | <b>0.473</b>  |
| K4                                     | 0.673                    | <b>0.563</b>  |
| K5                                     | 1.314                    | <b>0.879</b>  |
| K6                                     | 0.891                    | <b>0.737</b>  |
| K7                                     | 0.641                    | <b>0.618</b>  |
| K8                                     | 0.643                    | <b>0.536</b>  |
| K9                                     | 0.986                    | <b>0.693</b>  |
| K10                                    | 0.777                    | <b>0.598</b>  |

Lower RMSE value bolded
