# Supplementary figures and images for: Factors that influence mental health and well-being of high-performance athletes from Olympic or Paralympic sport who have transitioned out of national-level or international-level sport: a mixed methods approach
Source: PubMed Central journal article supplement — BMJ Open Sport Exerc Med. 2024 May 30;10(2):e001991. doi: 10.1136/bmjsem-2024-001991 (PMC11141181; doi:10.1136/bmjsem-2024-001991), 2024-05-30

## APPENDIX B

## Sports represented in the online survey cohort

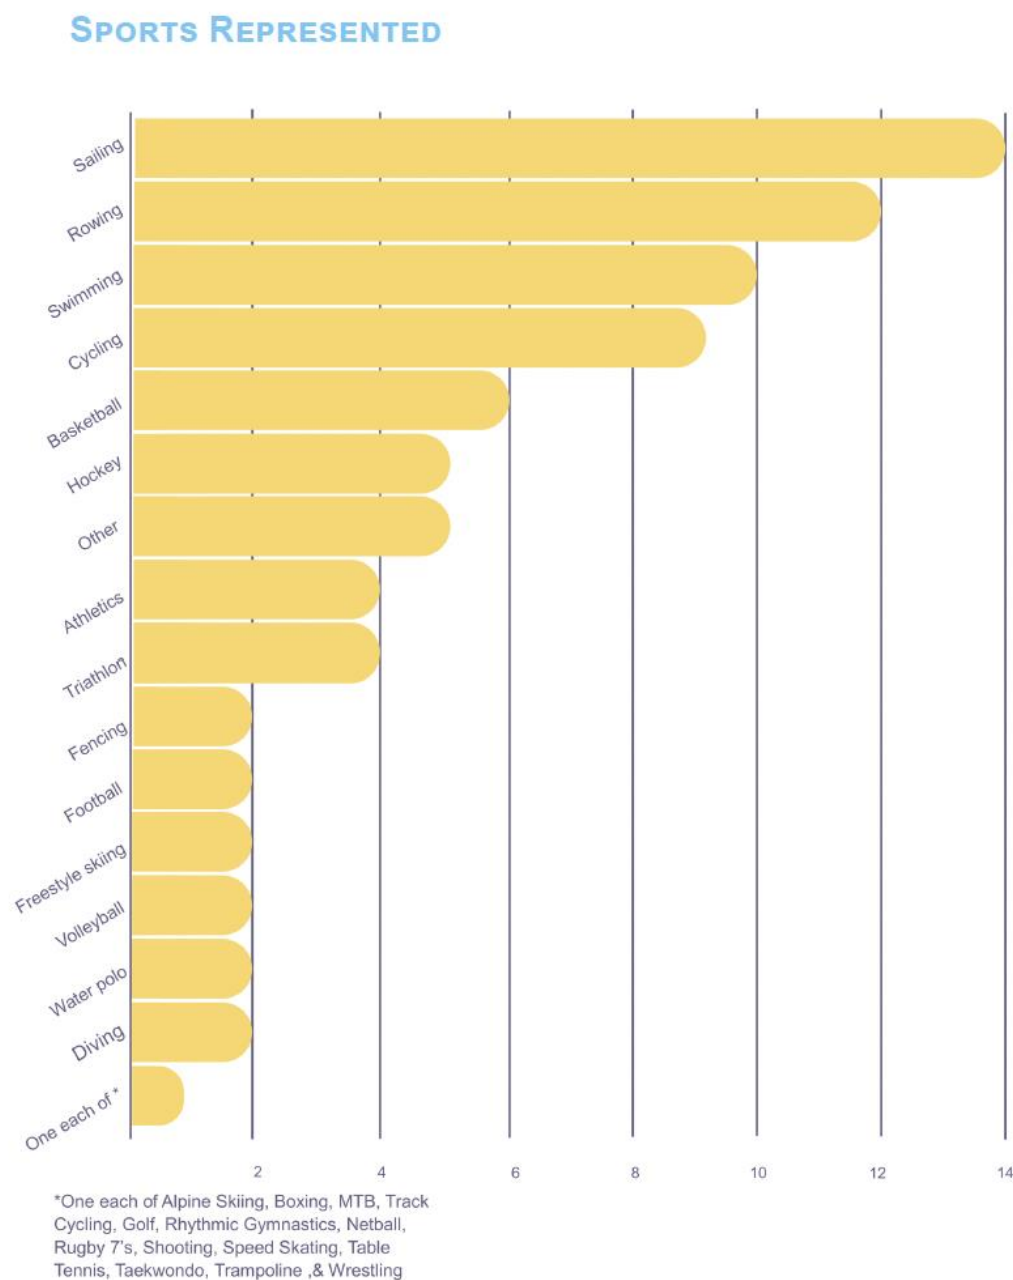

Supplement: bmjsem-2024-001991supp002.pdf [file bmjsem-2024-001991supp002.pdf]
